# Supplementary material for: Boron clusters (ferrabisdicarbollides) shaping the future as radiosensitizers for multimodal (chemo/radio/PBFR) therapy of glioblastoma
Source: Royal Society of Chemistry journal article supplement (doi:10.1039/d2tb01818g), 2022-01-01
Supplement: d2tb01818g1.pdf [file d2tb01818g1.pdf]

## SUPPORTING INFORMATION

### **Boron clusters (ferrabisdicarbollides), shaping the future as radiosensitizers for multimodal (chemo/radio/PBFR) therapy of glioblastoma.**

Miquel Nuez-Martínez<sup>1</sup>, María Queralt-Martín<sup>2</sup>, Amanda Muñoz-Juan<sup>1</sup>, Vicente M. Aguilera<sup>2</sup>, Anna Laromaine<sup>1</sup>, Francesc Teixidor<sup>1</sup>, Clara Viñas<sup>1\*</sup>, Catarina G. Pinto<sup>3</sup>, Teresa Pinheiro<sup>4</sup>, Joana F. Guerreiro<sup>3</sup>, Filipa Mendes<sup>3</sup>, Catarina Roma-Rodrigues<sup>5,6</sup>, Pedro V. Baptista<sup>5,6</sup>, Alexandra R. Fernandes<sup>5,6</sup>, Srečko Valic,<sup>7</sup> Fernanda Marques<sup>3\*</sup>.

<sup>1</sup> Institut de Ciència de Materials de Barcelona, ICMAB-CSIC, Campus Universitat Autònoma de Barcelona, 08193 Bellaterra, Spain

<sup>2</sup> Laboratory of Molecular Biophysics, Dept. of Physics, Universitat Jaume I, 12071 Castelló, Spain

<sup>3</sup> Centro de Ciências e Tecnologias Nucleares and Departamento de Engenharia e Ciências Nucleares, Instituto Superior Técnico, Universidade de Lisboa, Estrada Nacional 10, 2695-066 Bobadela LRS, Portugal

<sup>4</sup> iBB – Instituto de Bioengenharia e Biociências, Departamento de Engenharia e Ciências Nucleares, Instituto Superior Técnico, Universidade de Lisboa, Av. Rovisco Pais 1, 1049-001 Lisboa, Portugal

<sup>5</sup> UCIBIO – Applied Molecular Biosciences Unit, Department of Life Sciences, NOVA School of Science and Technology, NOVA University Lisbon, 2819-516 Caparica, Portugal

<sup>6</sup> Associate Laboratory i4HB - Institute for Health and Bioeconomy, NOVA School of Science and Technology, NOVA University Lisbon, 2819-516 Caparica, Portugal

<sup>7</sup> Ruđer Bošković Institute, Bijenička 54, HR-10000 Zagreb, Croatia

**Scheme S.1.-** Synthesis of Cs[8,8'-I<sub>2</sub>-*o*-FESAN] and Na[8,8'-I<sub>2</sub>-*o*-FESAN]. a) N-iodosuccinidide in Et(OH); b) cationic exchange resin.<sup>1</sup> Circles in grey represent the C<sub>c</sub>-H vertices, the orange ones correspond to Fe<sup>3+</sup> while the circles in dark and light pink correspond to B-H and B-I vertices, respectively.

**Figure S1.** UV-visible spectra of the ferrabis(dicarbollides) in 0.08 mM aqueous solution: in red, Na[*o*-FESAN] and in dashed red its peaks' deconvolution at 271 and 295 nm; in green, Na[8,8'-I<sub>2</sub>-*o*-FESAN] and in dashed green its peaks' deconvolution at 289 and 343 nm.

**Figure S2.** Spectra of Na[*o*-FESAN] and Na[8,8'-I<sub>2</sub>-*o*-FESAN] in powder and cavity background signal. Values of the *g* factors indicated by numbers are following: 1=4.7, 2=3.7, 3=2.7 and 4=2.0.

**Figure S3.-** TGA/DSC of Na[*o*-FESAN].

**Figure S4.-** TGA/DSC of Na[8,8'-I<sub>2</sub>-*o*-FESAN].

**Figure S5.-** a) <sup>11</sup>B{<sup>1</sup>H}-NMR spectra of 2 mM of Na[*o*-FESAN] in aqueous solution (blue), in 0.1M phosphate buffer (green), in DMEM (red), DMEM + 10% FBS (purple); the spectra were run with a relaxation time parameter of 2.62 s.

**Figure S6.-** a) <sup>11</sup>B{<sup>1</sup>H}-NMR spectra of 2 mM of Na[*o*-FESAN] in aqueous solution (blue), in 0.1M phosphate buffer (green), in DMEM (red), DMEM + 10% FBS (purple); the spectra were run with a relaxation time parameter of 0.015 s.

**Figure S7.-** DLS measurements of aqueous solution of 2 mM of Na[*o*-FESAN] in blue, in 0.1M phosphate buffer (green), in DMEM (red), in DMEM + 10% FBS (purple). DMEM + 10% FBS (black).

**Scheme S1.-** Synthesis of Cs[8,8'-I<sub>2</sub>-o-FESAN] and Na[8,8'-I<sub>2</sub>-o-FESAN]. a) N-iodosuccinidide in Et(OH); b) cationic exchange resin.<sup>1</sup> Circles in grey represent the C<sub>c</sub>-H vertices, the orange ones correspond to Fe<sup>3+</sup> while the circles in dark and light pink correspond to B-H and B-I vertices, respectively.

a)

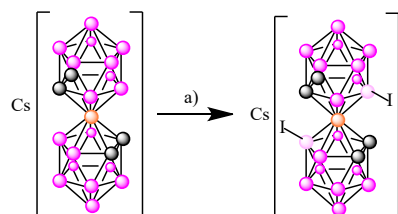

b)

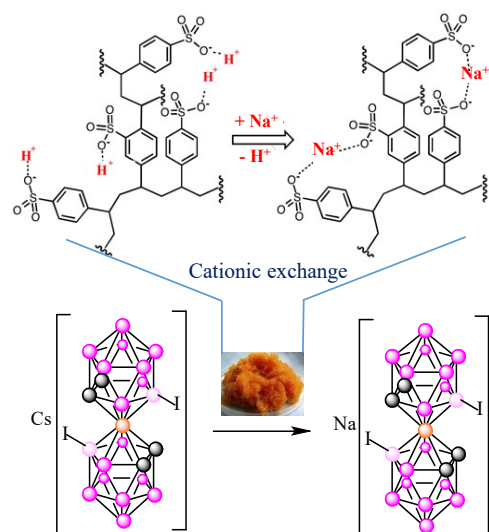

**Figure S1.** UV-visible spectra of the ferrabis(dicarbollides) in 0.08 mM aqueous solution: in red, Na[*o*-FESAN] and in dashed red its peaks' deconvolution at 271 and 295 nm; in green, Na[8,8'-I<sub>2</sub>-*o*-FESAN] and in dashed green its peaks' deconvolution at 289 and 343 nm.

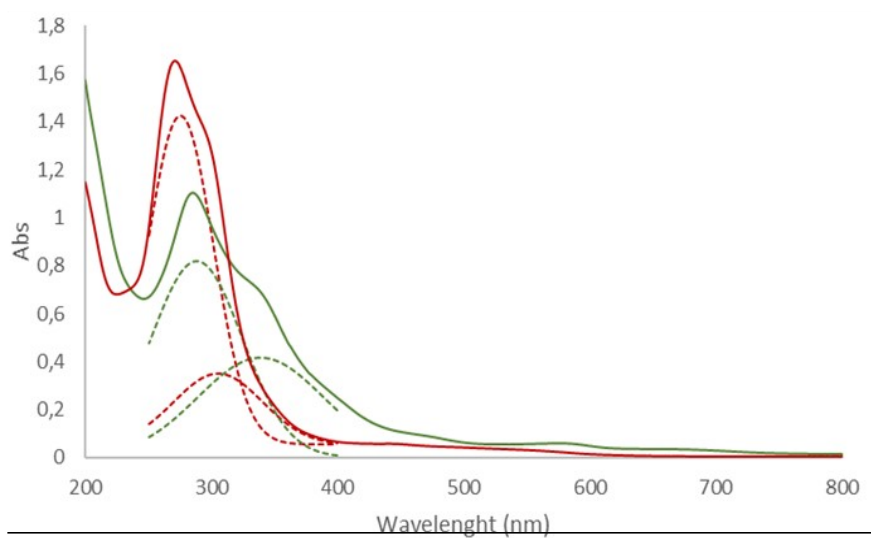

**Figure S2.** Spectra of Na[*o*-FESAN] and Na[8,8'-I<sub>2</sub>-*o*-FESAN] in powder and cavity background signal. Values of the *g* factors indicated by numbers are following: 1=4.7, 2=3.7, 3=2.7 and 4=2.0.

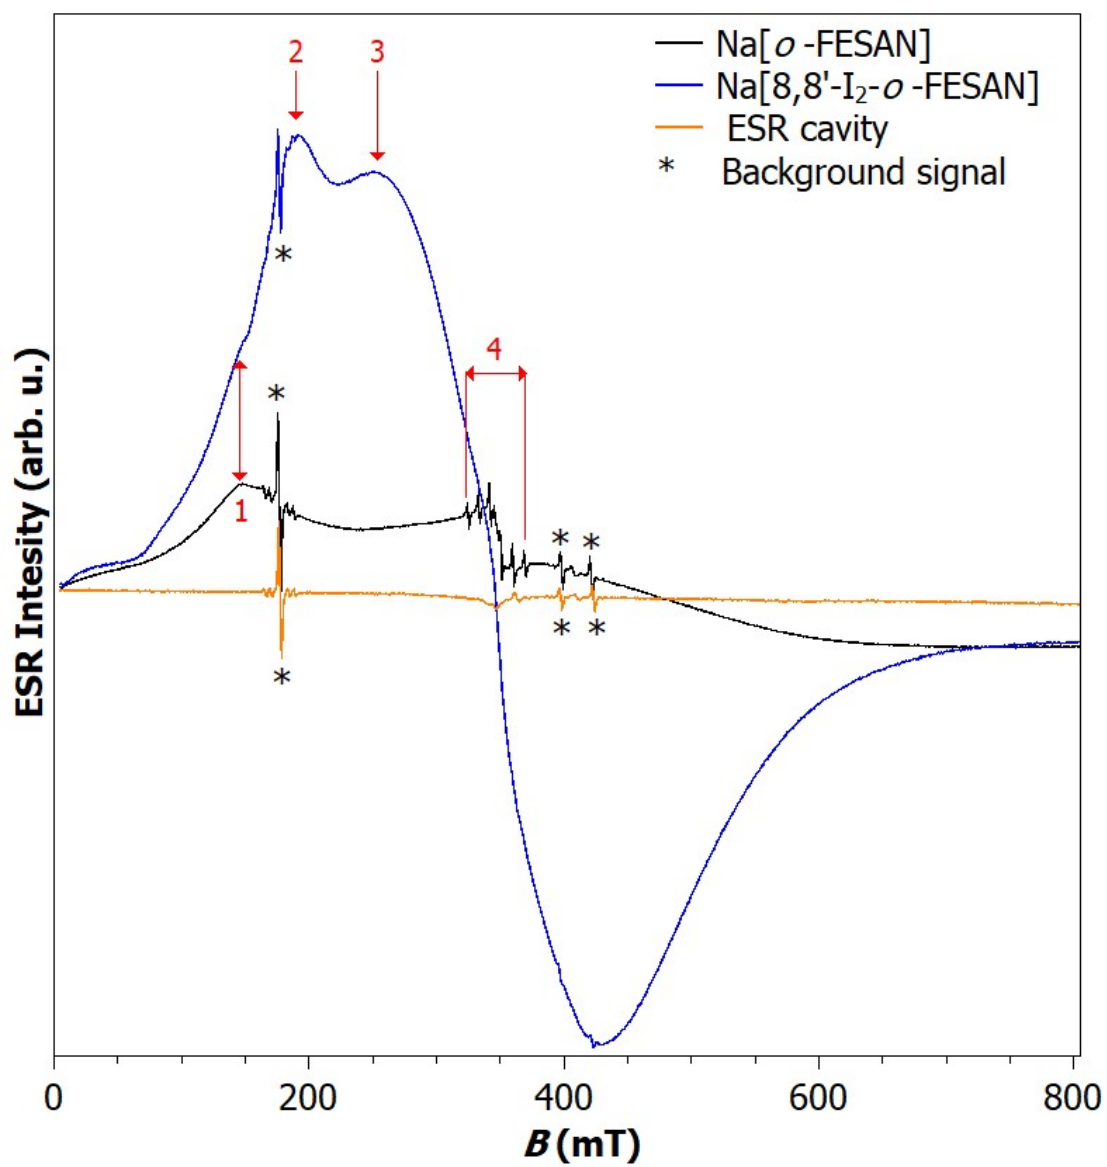

Figure S3.- TGA/DSC of Na[*o*-FESAN].

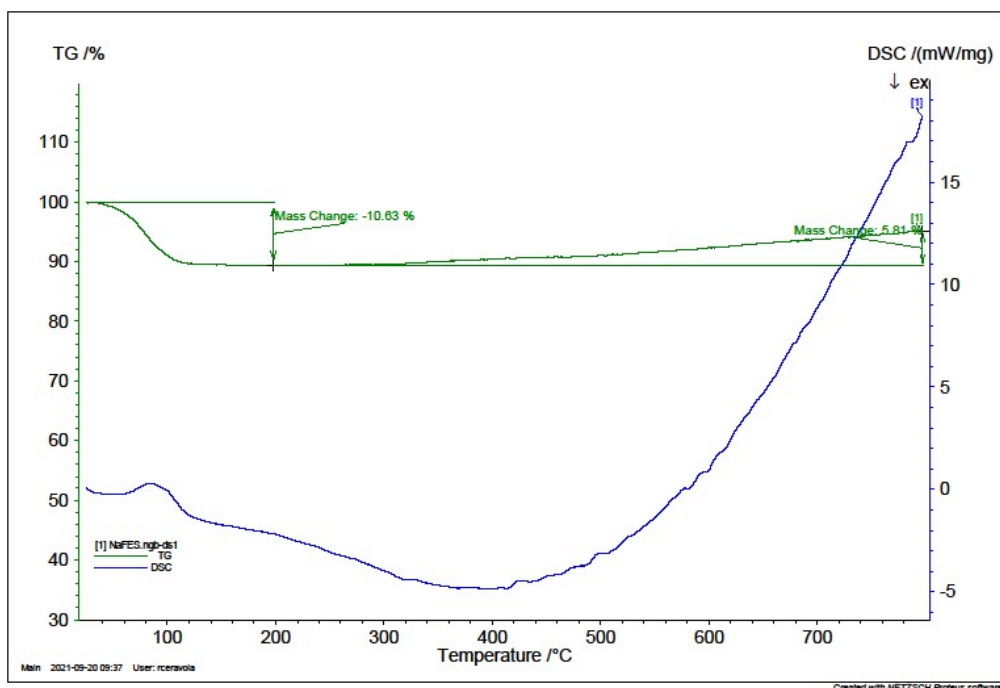

Figure S4.- TGA/DSC of Na[8,8'-I<sub>2</sub>-o-FESAN].

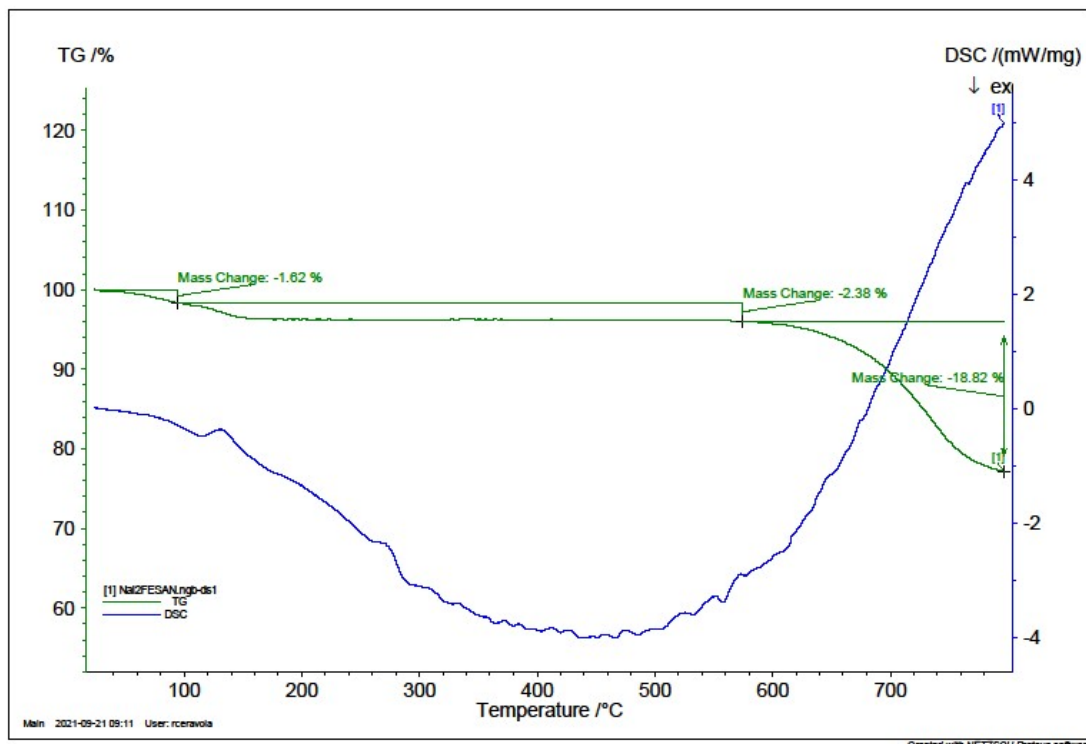

**Figure S5.-** a)  $^{11}\text{B}\{^1\text{H}\}$ -NMR spectra of 2 mM of Na[o-FESAN] in aqueous solution (blue), in 0.1M phosphate buffer (green), in DMEM (red), DMEM + 10% FBS (purple); the spectra were run with a relaxation time parameter of 2.62 s.

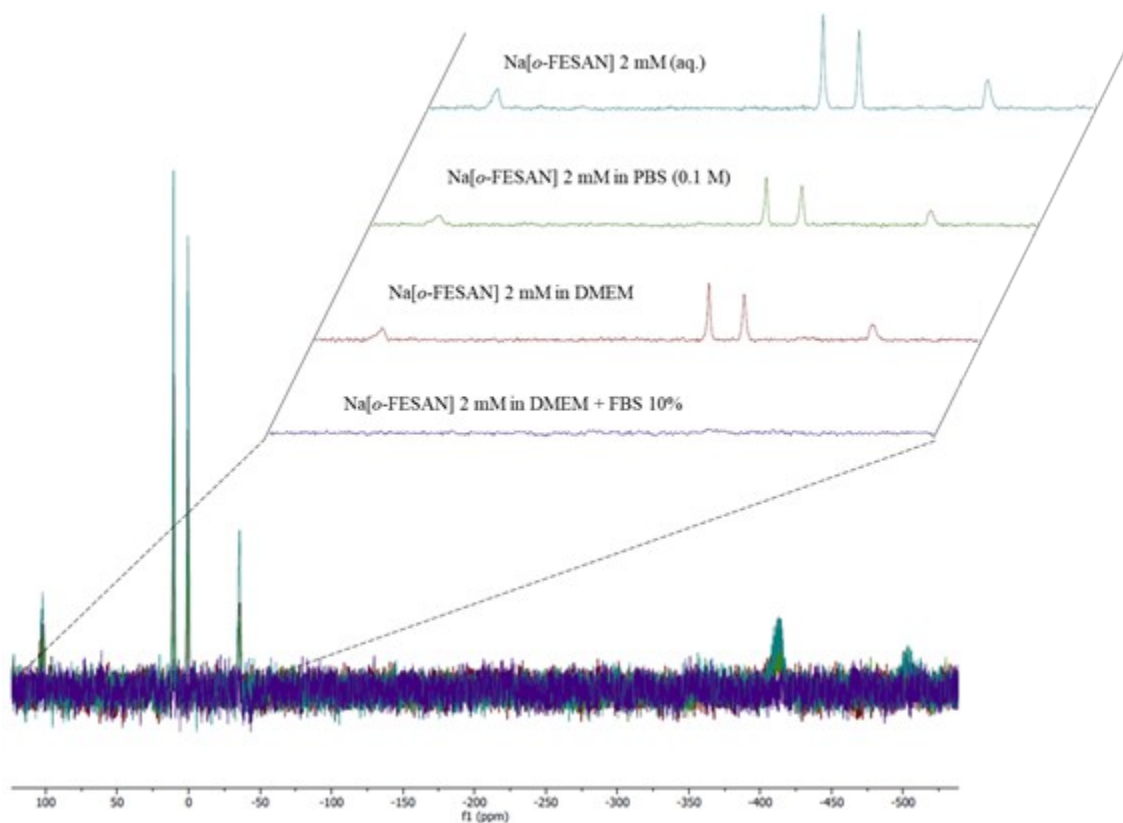



**Figure S6.-** a)  $^{11}\text{B}\{^1\text{H}\}$ -NMR spectra of 2 mM of Na[o-FESAN] in aqueous solution (blue), in 0.1M phosphate buffer (green), in DMEM (red), DMEM + 10% FBS (purple); the spectra were run with a relaxation time parameter of 0.015 s.

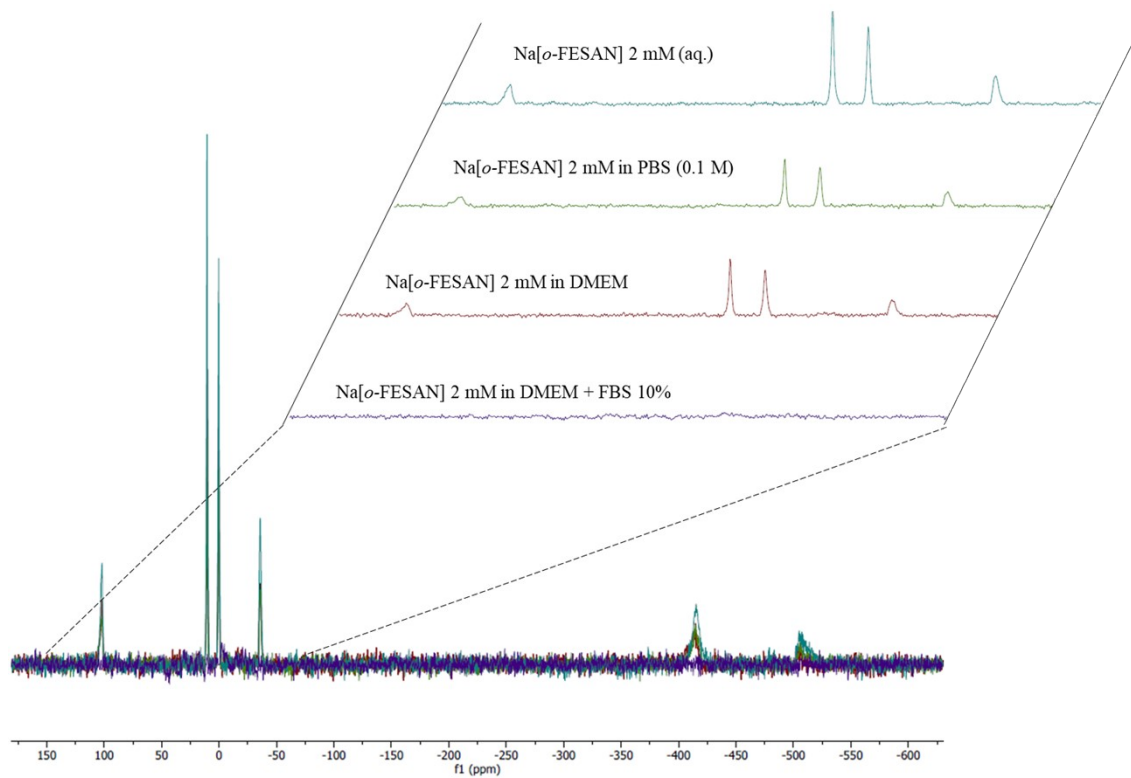

**Figure S7.-** DLS measurements of aqueous solution of 2 mM of Na[*o*-FESAN] in blue, in 0.1M phosphate buffer (green), in DMEM (red), in DMEM + 10% FBS (purple). DMEM + 10% FBS (black).

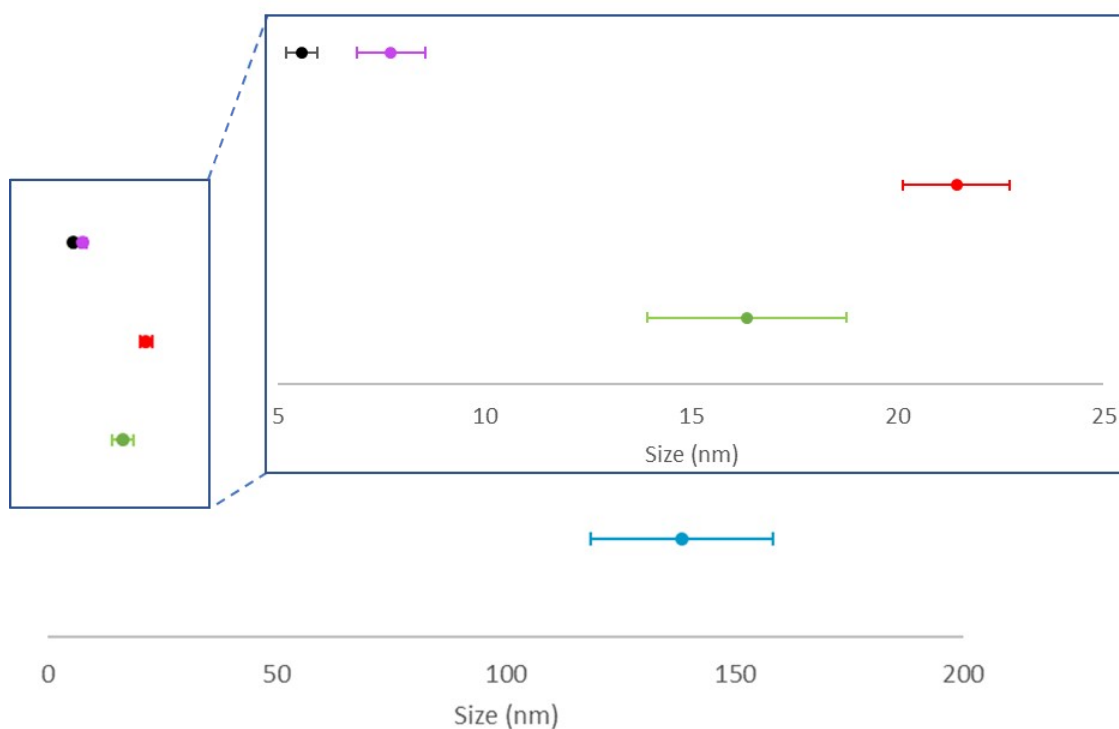

Na[*o*-FESAN] 2 mM (aq.): 138.4±19.9 nm (in blue)

Na[*o*-FESAN] 2 mM in PBS (0.1 M): 16.4±2.4 nm (in green)

Na[*o*-FESAN] 2 mM in DMEM: 21.4±1.3 nm (in red)

DMEM + 10% FBS: 5.58±0.38 nm (in black)

Na[*o*-FESAN] 2 mM in DMEM + 10% FBS: 7.73±0.82 nm (in violet)

DMEM and PBS (0.1 M) alone gave error measurements meaning they present no aggregates.

FBS seems to dock Na[*o*-FESAN] or either Na[*o*-FESAN] surrounds FBS since size grows 2.15 nm in presence of the metallacarborane.

## References:

---

<sup>i</sup> Bennour, I.; Ramos, M.N.; Nuez, M.; Xavier, J.A.M.; Buades, A.B.; Sillanpää, R.; Teixidor, F.; Choquesillo-Lazarte, D.; Romero, I.; Martinez-Medina M.; Viñas, C. Water Soluble Organometallic Small Molecules as Promising Antibacterial Agents: Synthesis, Physical-chemistry properties and Biological Evaluation to Tackling Bacterial Infections, *Dalton Trans.*, **2022**, 51, 7188–7209, DOI: 10.1039/D2DT01015A
